# Supplementary material
Source: publisher figshare collection journal article supplement (https://tandf.figshare.com/ndownloader/files/19970006)
Supplement: Supplementary file 1 [file 19970006]

**Appendix**


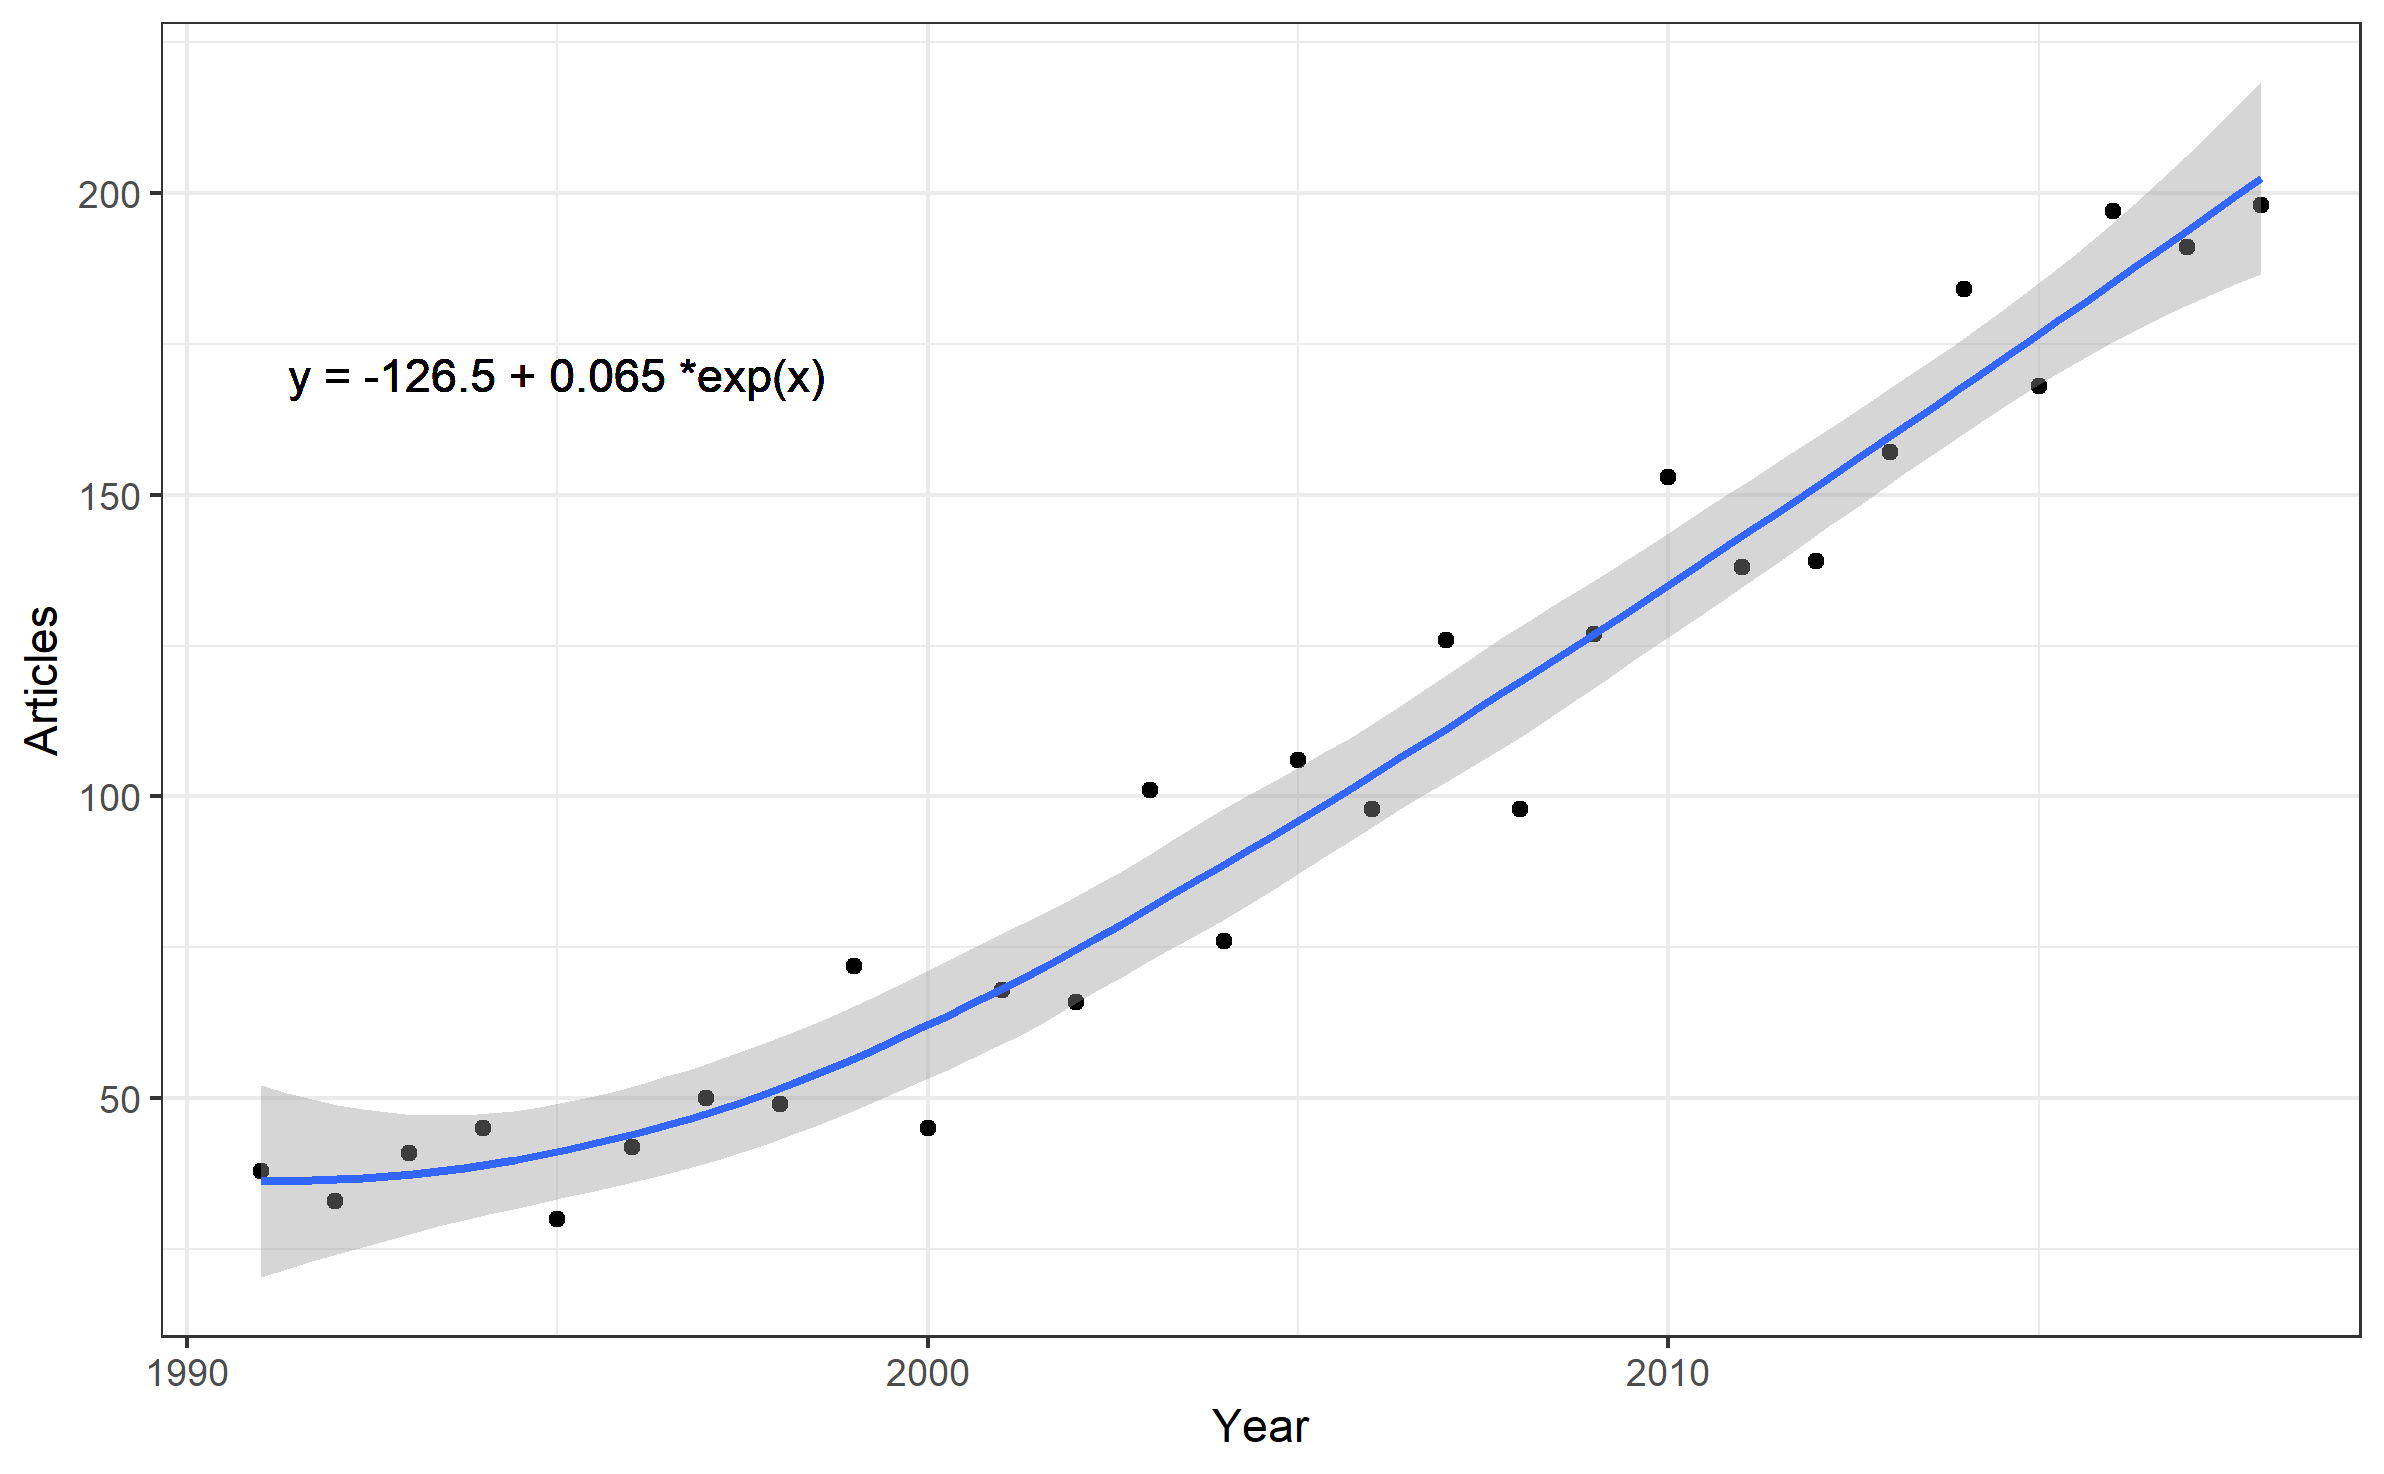
Figure S1. Annual publication production in our study. The formula fitted a non-linear relationship (formula = nls(y~a +exp (b* x))


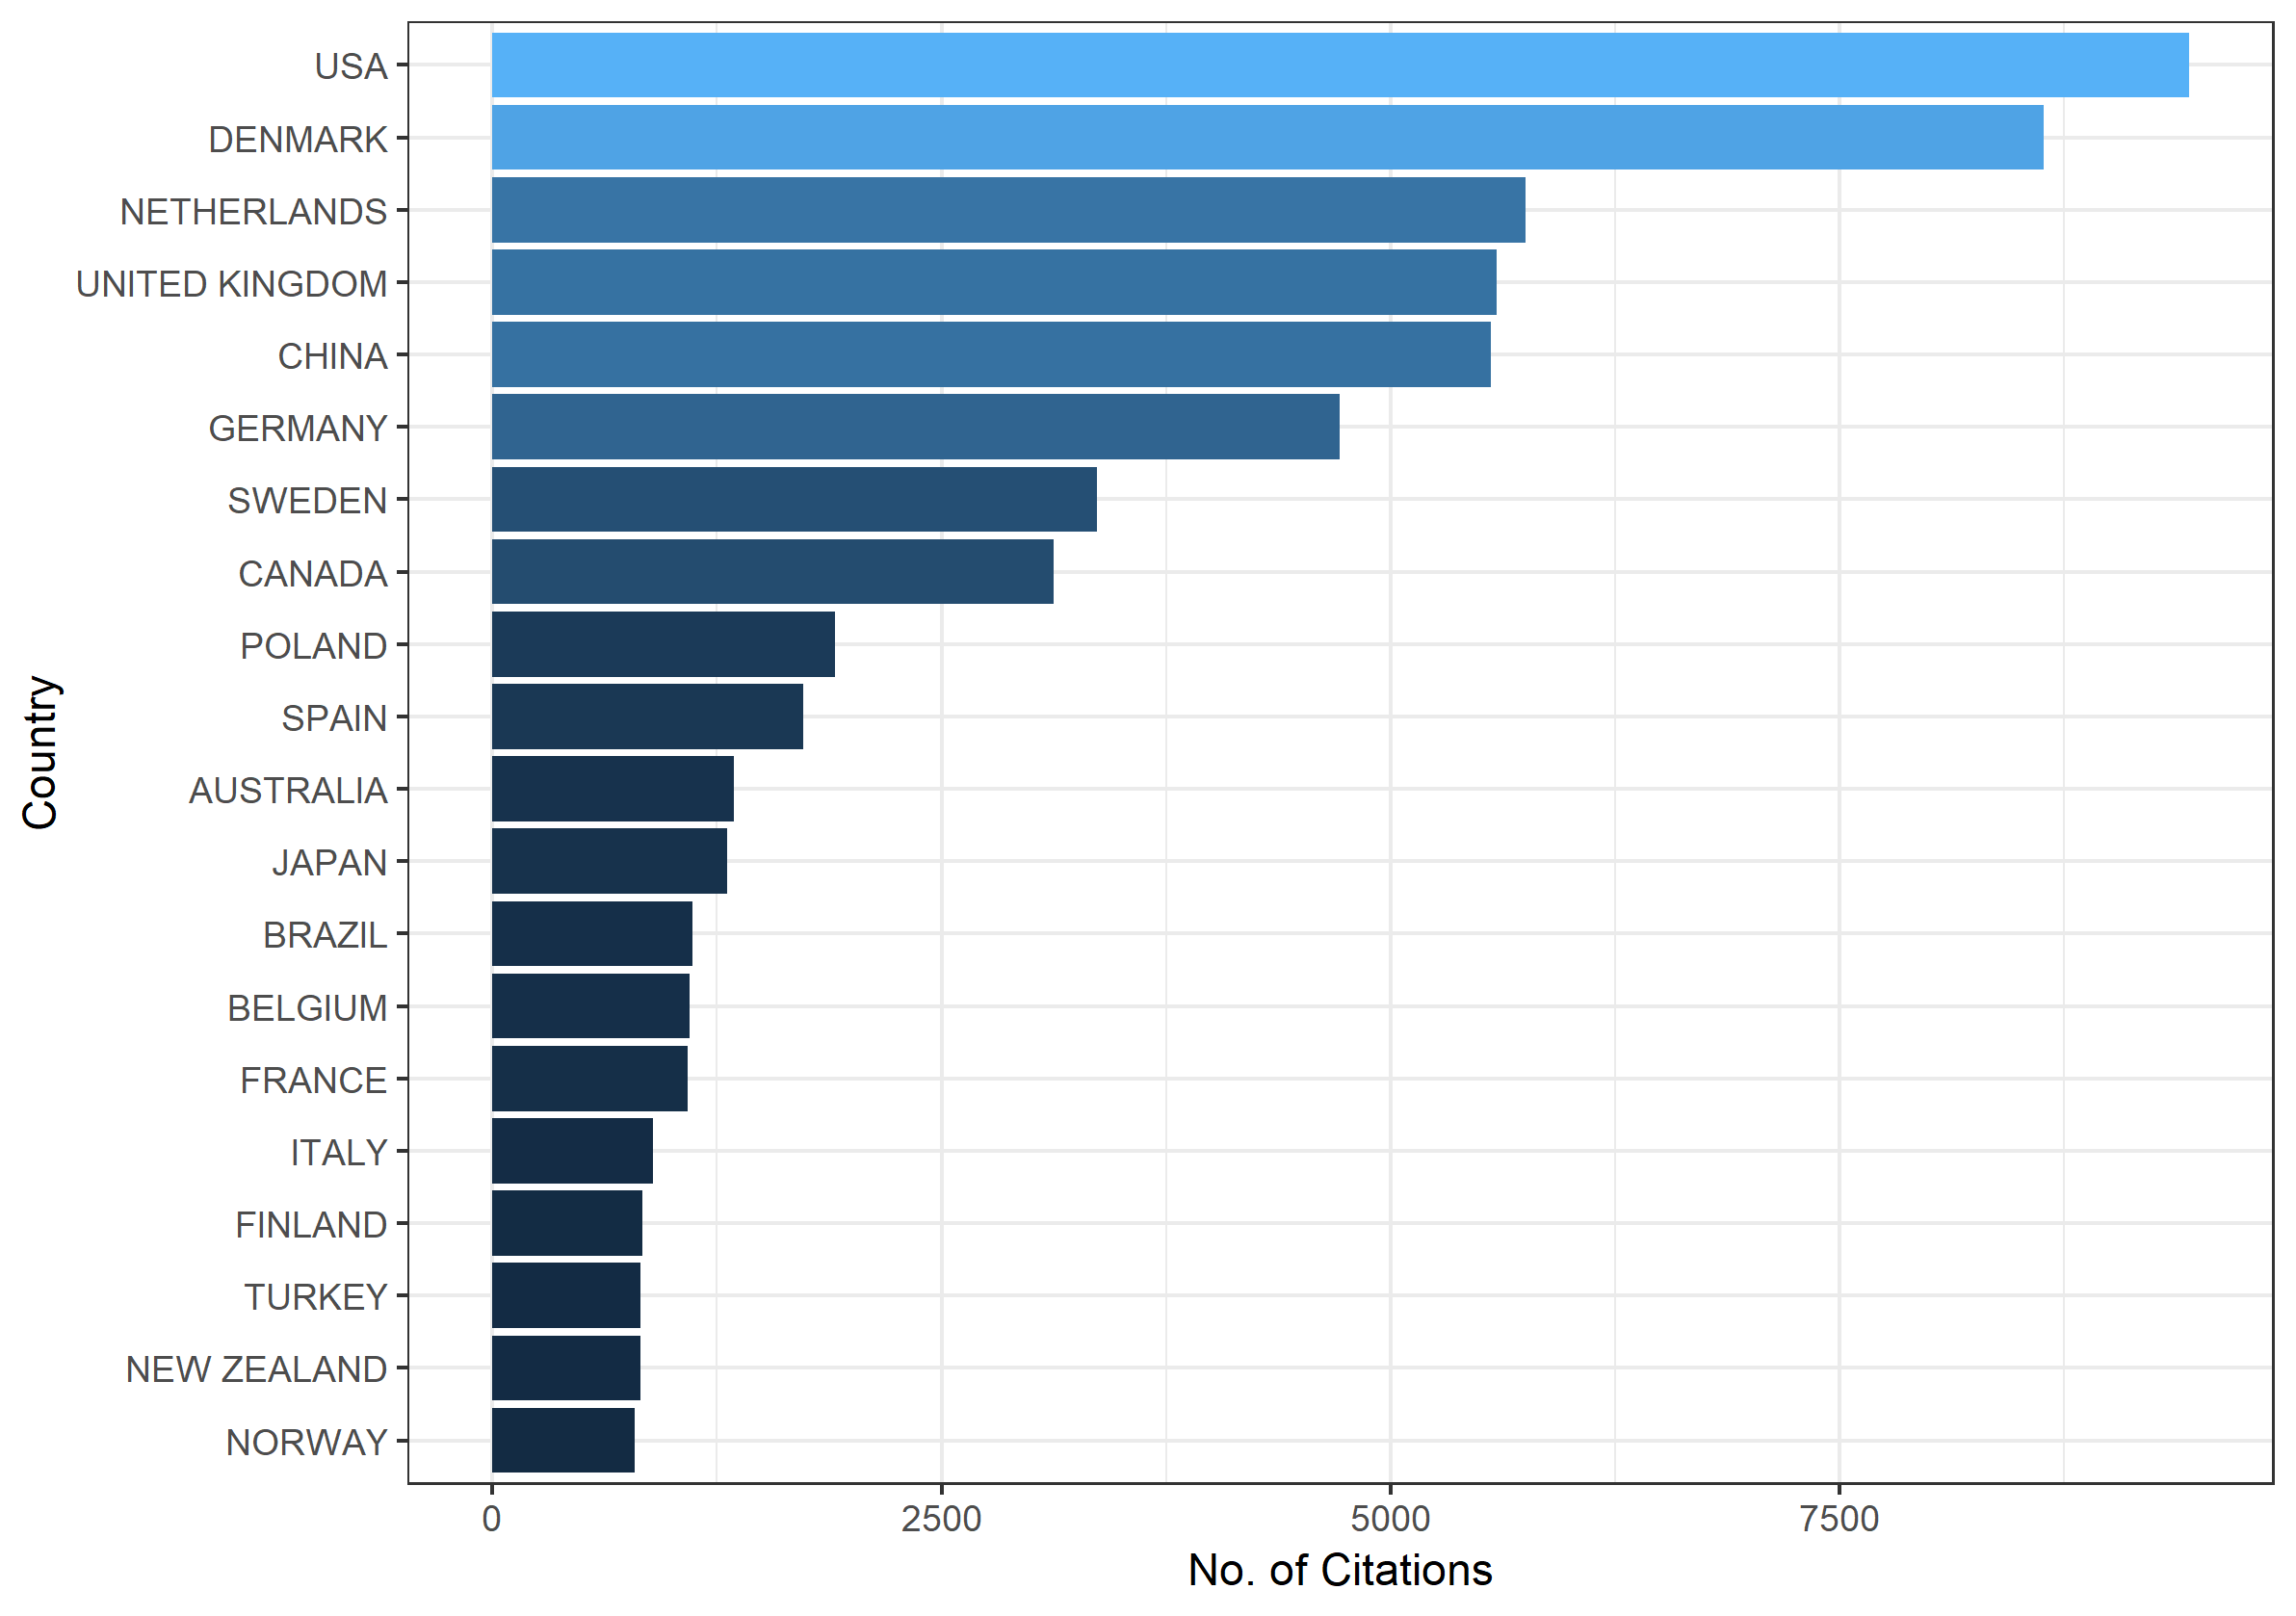


Figure S2. Top 20 most cited countries in the study.


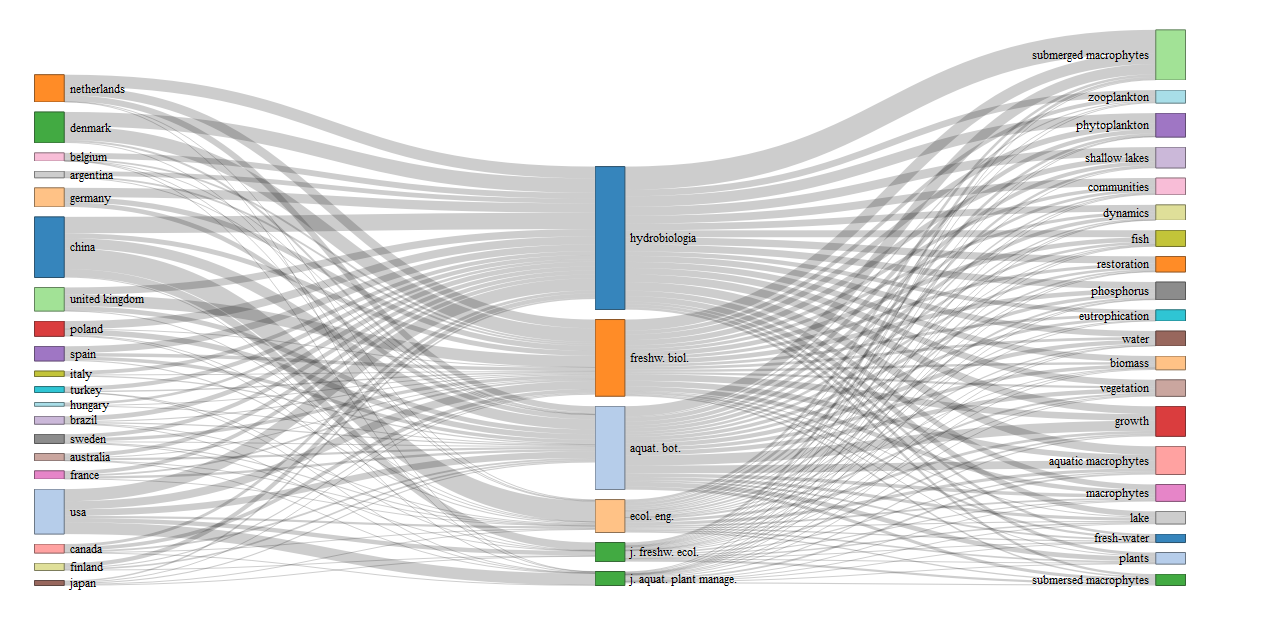


Figure S3. Plot of three fields (country, source and Keywords Plus) through a Sankey diagram


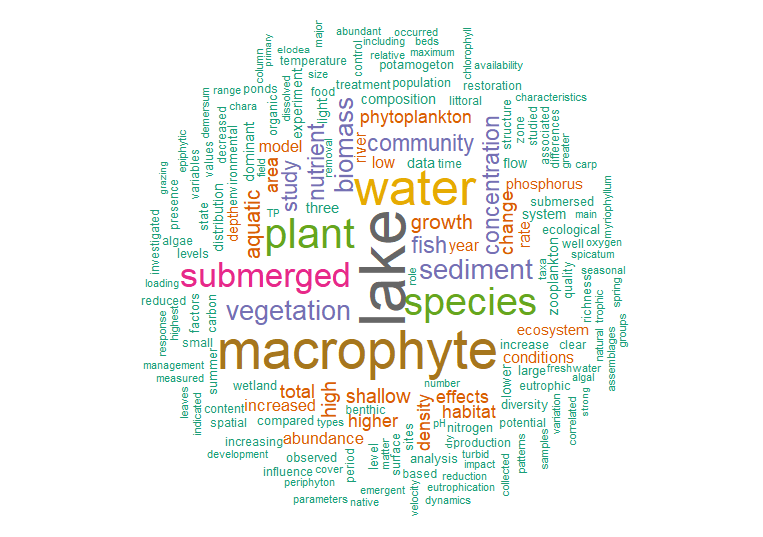


Figure S4. Word cloud of Top 100 most frequent words based on words extracted from the abstract retrieved in the study.


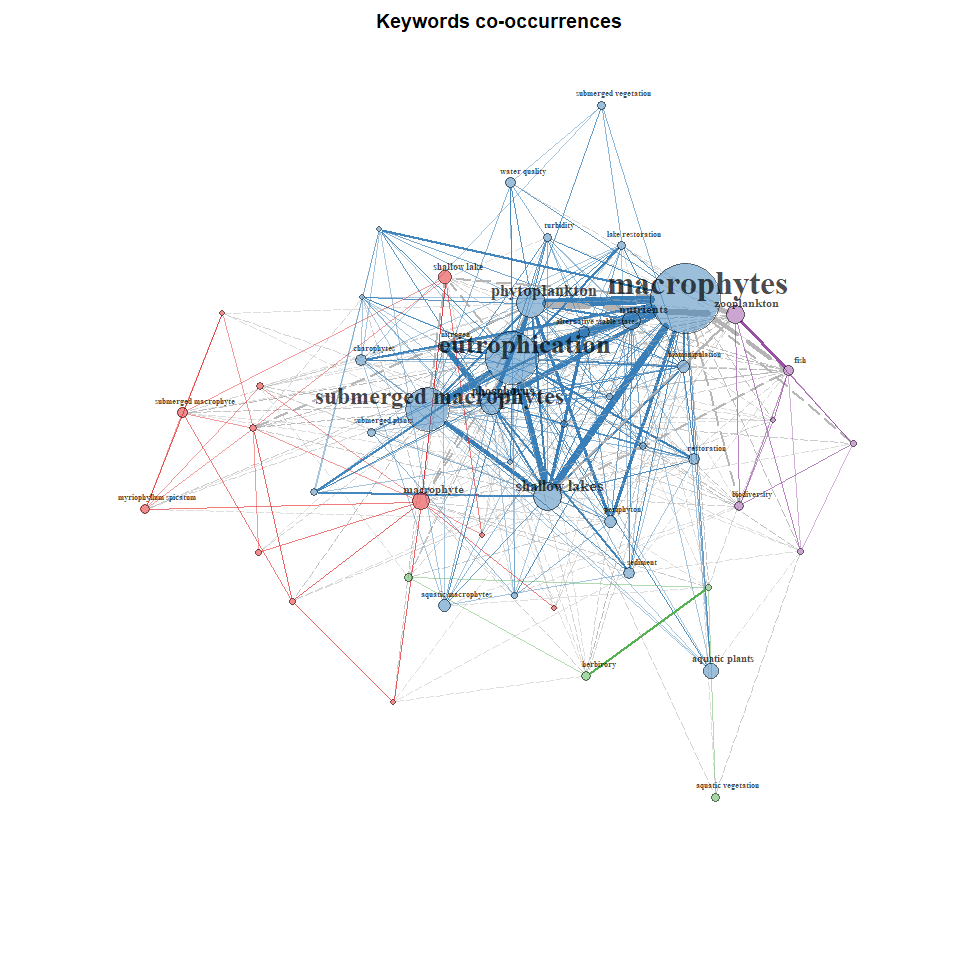


Figure S5. Keywords co-occurrence of retrieved articles in the study.


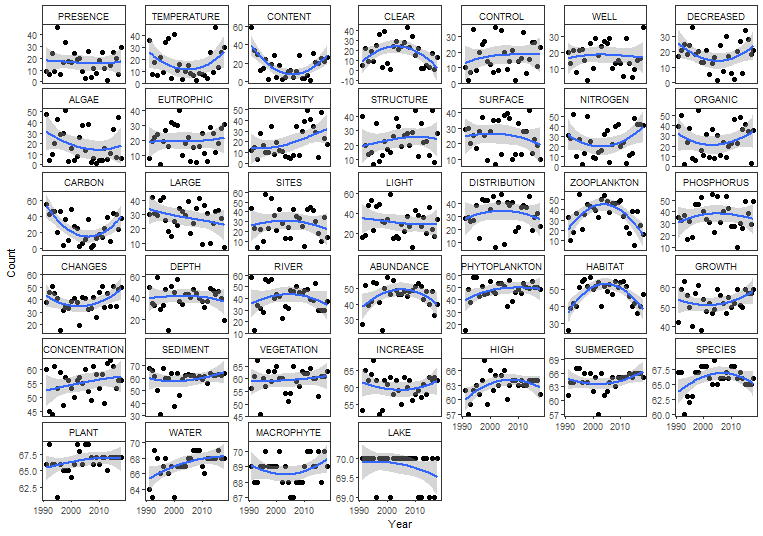


Figure S6. High-frequency words without significant monotonic trends in abstracts of retrieved articles in the study


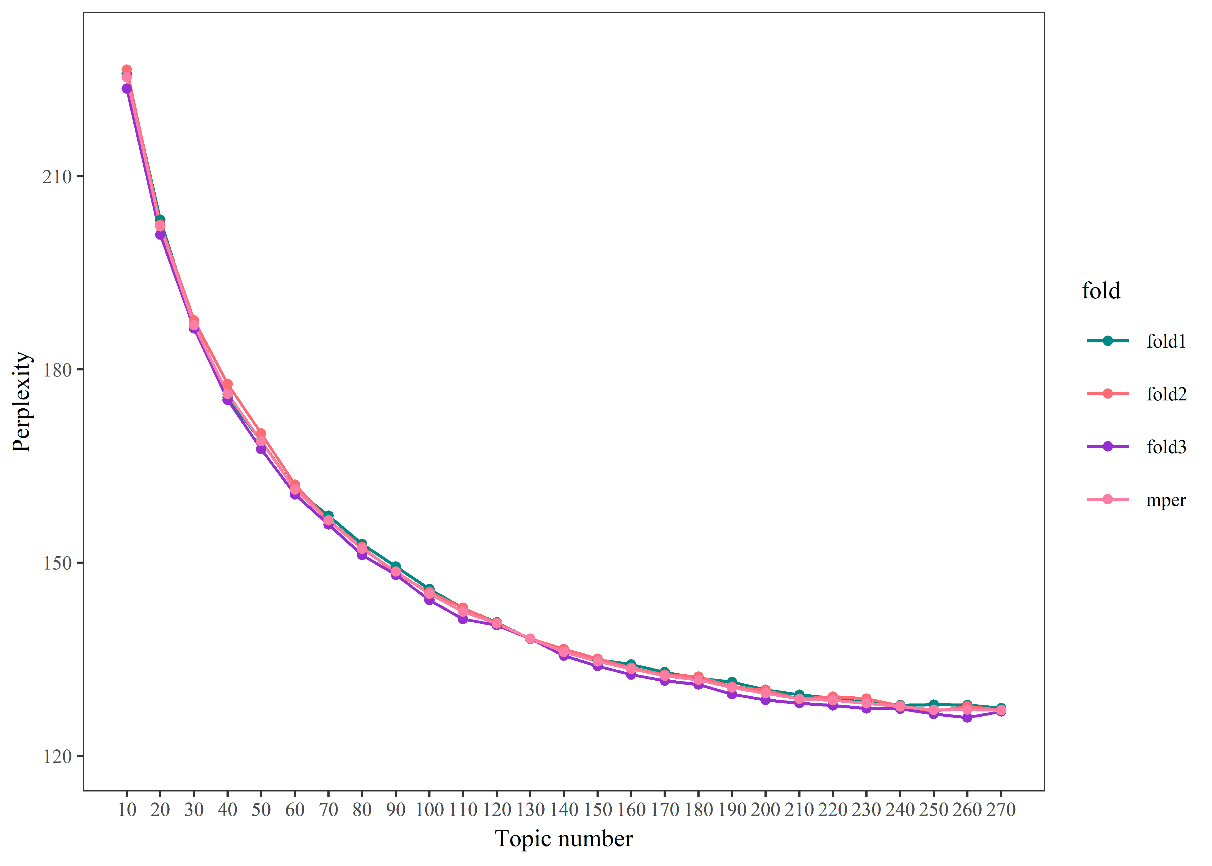


Figure S7. K-fold cross validation of the optimum topic numbers based on perplexity. K was set as three in the study.
